# Supplementary material
Source: MDPI journal article supplement (https://www.mdpi.com/2073-4344/9/9/774)
Supplement: s1 [file s1]

# One-Pot Solvent-Free Synthesis of *N,N*-Bis(2-Hydroxyethyl) Alkylamide from Triglycerides Using Zinc-Doped Calcium Oxide Nanospheroids as a Heterogeneous Catalyst

Dinesh Kumar,<sup>1,\*</sup> Chan Hee Park<sup>1,2,\*</sup> and Cheol Sang Kim<sup>1,\*</sup>

<sup>1</sup> Department of Bionanosystem Engineering, Chonbuk National University, Jeonju 561756, South Korea

<sup>2</sup> Department of Mechanical Design Engineering, Chonbuk National University, Jeonju 561756, South Korea

\* Correspondence: dinesh.tu@gmail.com (D.K.), biochan@jbnu.ac.kr (C.H.P.), chskim@jbnu.ac.kr (C.S.K.); Tel.: +82-63-270-4283 (D.K.), +82-63-270-4284 (C.H.P.), +82-63-270-4284 (C.S.K.)

Received: 1 September 2019; Accepted: 13 September 2019; Published: 14 September 2019

**Table S1.** The chemical analysis of vegetable oils.

| Feedstock          | Free fatty acid value (wt%) | Moisture content (wt%) | Saponification value (mg KOH/g) | Iodine value |
|--------------------|-----------------------------|------------------------|---------------------------------|--------------|
| Waste soybean oil  | 2.1                         | 0.35                   | 192.4                           | 101.4        |
| Karanja oil        | 4.4                         | 0.37                   | 186.0                           | 97.6         |
| Jatropha oil       | 8.2                         | 0.41                   | 196.1                           | 102.3        |
| Virgin Soybean oil | 0.2                         | 0.31                   | 191.3                           | 121.4        |
| Animal fat         | 1.4                         | 0.36                   | 193.1                           | 46.8         |

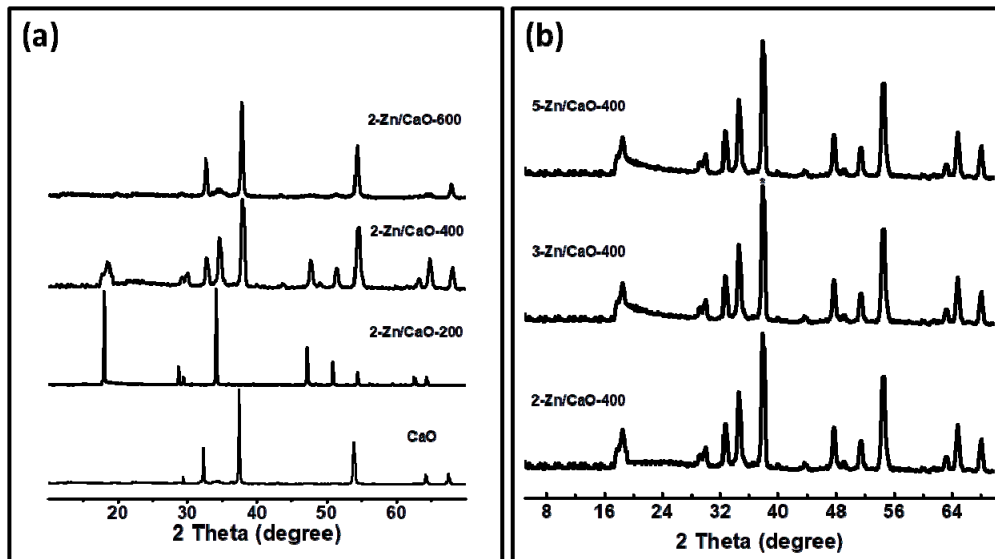

**Figure S1.** Comparative powder XRD patterns of (a) CaO with Zn/CaO calcined at different temperatures, (b) Zn/CaO with different doping percentage of zinc ion.

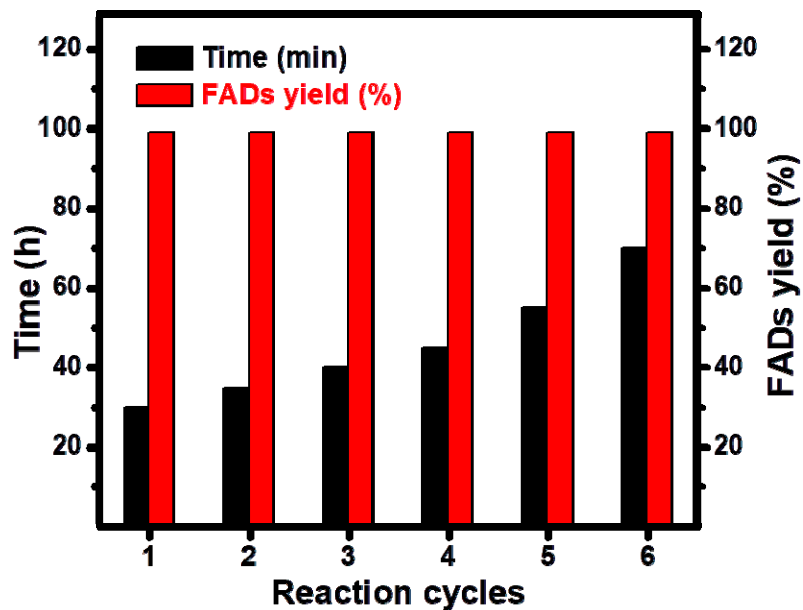

**Figure S2.** Recyclability studies of the catalyst towards the aminolysis of the JO. Reaction conditions; diethanolamine:feedstock = 5:1 (m/m), catalyst amount = 4 wt% of feedstock, temperature = 90 °C

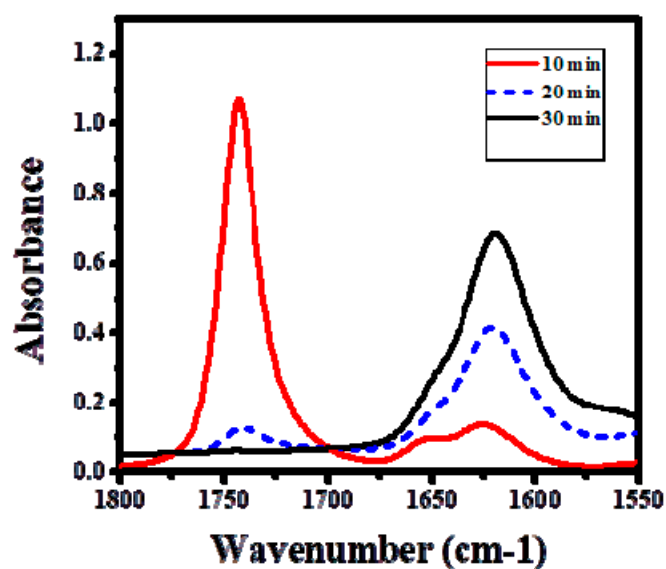

**Figure S3.** Progress of the aminolysis of JO with diethanolamine followed by FTIR spectroscopy. Reaction conditions; diethanolamine: cotton seed oil = 5:1 (m/m), catalyst amount = 4 wt%, temperature = 90 °C.

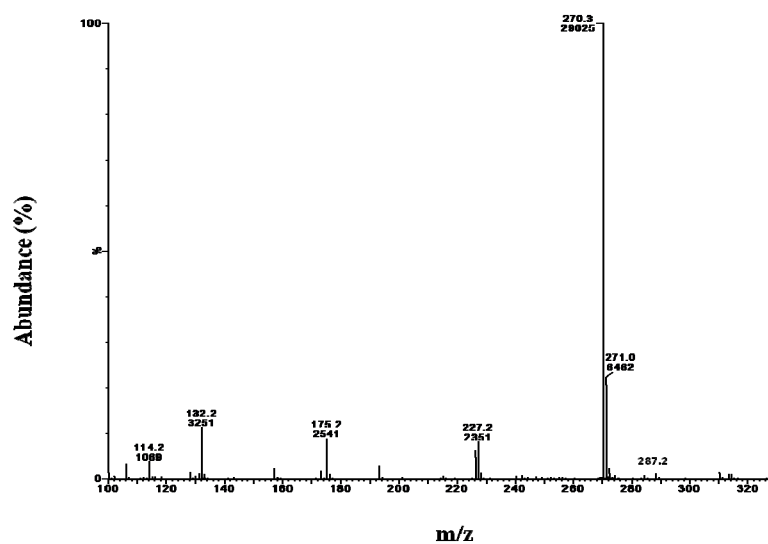

**Figure S4.** Mass spectrum of fatty acid diethanolamide derived from methyl laurate.
